# Supplementary material
Source: Springer Nature journal article supplement (https://www.springermedizin.de/resource/supplementary/12889_2011_3763_MOESM1_ESM.pdf/9489740)
Supplement: MOESM1 [file 9489740]

**1921-26 Cohort**

**PBS Consenters (n=5484)**

**Concessional Beneficiaries (n=4427)**

**Rofecoxib Users (n=564)**

**Continuous Users**

( $\geq 9$  prescriptions)

(n=181)

Median number = 11

(IQR: 10-12)

**Non-Continuous Users**

(< 9 prescriptions)

(n=383)

Median number = 2

(IQR: 1-4)
